# Supplementary material for: Supraphysiological activation of TAK1 promotes skeletal muscle growth and mitigates neurogenic atrophy
Source: PubMed Central journal article supplement (PMC9033787; doi:10.1038/s41467-022-29752-0), 2022-04-22
Supplement: 41467_2022_29752_MOESM1_ESM.pdf [file 41467_2022_29752_MOESM1_ESM.pdf]

## Supplementary Data File

### Supraphysiological activation of TAK1 promotes skeletal muscle growth and mitigates neurogenic atrophy

By

Anirban Roy<sup>1</sup> and Ashok Kumar<sup>1\*</sup>

<sup>1</sup>Department of Pharmacological and Pharmaceutical Sciences, University of Houston College of Pharmacy, Houston, TX 77204, USA

**\*Corresponding author:**

Ashok Kumar, Ph.D.  
Department of Pharmacological and Pharmaceutical Sciences  
Health Building 2, Room 5012  
College of Pharmacy  
University of Houston  
4849 Calhoun Road  
Houston, TX 77204-1217

Phone: 713-743-3376

Email: [akumar43@Central.UH.EDU](mailto:akumar43@Central.UH.EDU)

**This file contains:**

Supplementary Figures 1-9

Supplementary Table 1 and 2.

## Supplementary Figure 1

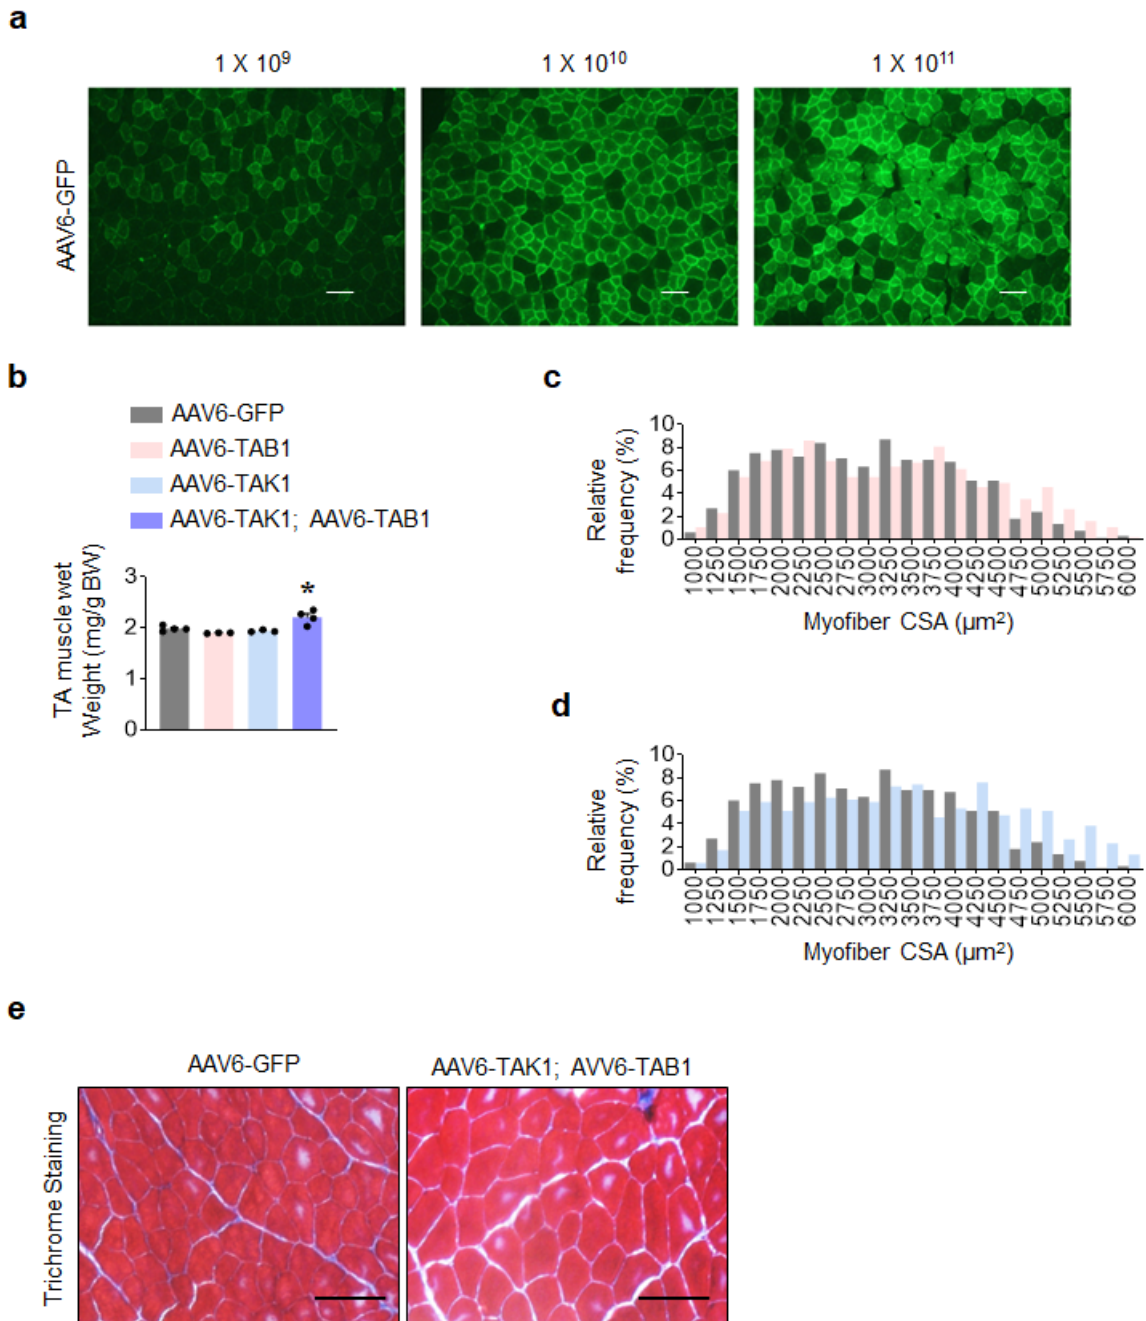

**Supplementary Figure 1. Effect of overexpression of TAK1, TAB1, or combination of TAK1 and TAB1 on muscle growth and fibrosis. (a) TA muscles of 3-month old C57BL/6**

mice were injected with AAV6-GFP vector at indicated doses. After 5 days, the mice were sacrificed and TA muscle was isolated. Finally, transverse TA muscle sections were generated and analyzed for GFP expression using a fluorescence microscope. Representative photomicrographs are presented here. Scale bar, 100  $\mu\text{m}$ . **(b)** Left side TA muscle of C57BL/6 mice was given intramuscular injection of AAV6-TAB1 ( $2.5 \times 10^{10}$  vg), AAV6-TAK1 ( $2.5 \times 10^{10}$  vg), or a combination of AAV6-TAB1 ( $1.25 \times 10^{10}$  vg) and AAV6-TAK1 ( $1.25 \times 10^{10}$  vg) while the contralateral right TA muscle was injected with AAV6-GFP ( $2.5 \times 10^{10}$  vg) particles. After 28 days, the mice were euthanized and the TA muscles were harvested and analyzed. Average TA muscle weight normalized with body weight (BW) of mice. N=3-4 in each group. Data presented as mean  $\pm$  SEM. \* $p < 0.05$ , values significantly different from contralateral AAV6-GFP alone injected TA muscle by one-way ANOVA followed by Tukey's multiple comparison test. **(c)** Relative frequency distribution of myofiber cross sectional area (CSA) in TA muscle injected with AAV6-GFP or AAV6-TAB1 alone. **(d)** Relative frequency distribution of myofiber CSA in TA muscle injected with AAV6-GFP or AAV6-TAK1 alone. **(e)** TA muscle sections made were stained with Trichrome Masson's staining. Representative photomicrographs are presented here. Scale bar, 100  $\mu\text{m}$ .

## Supplementary Figure 2

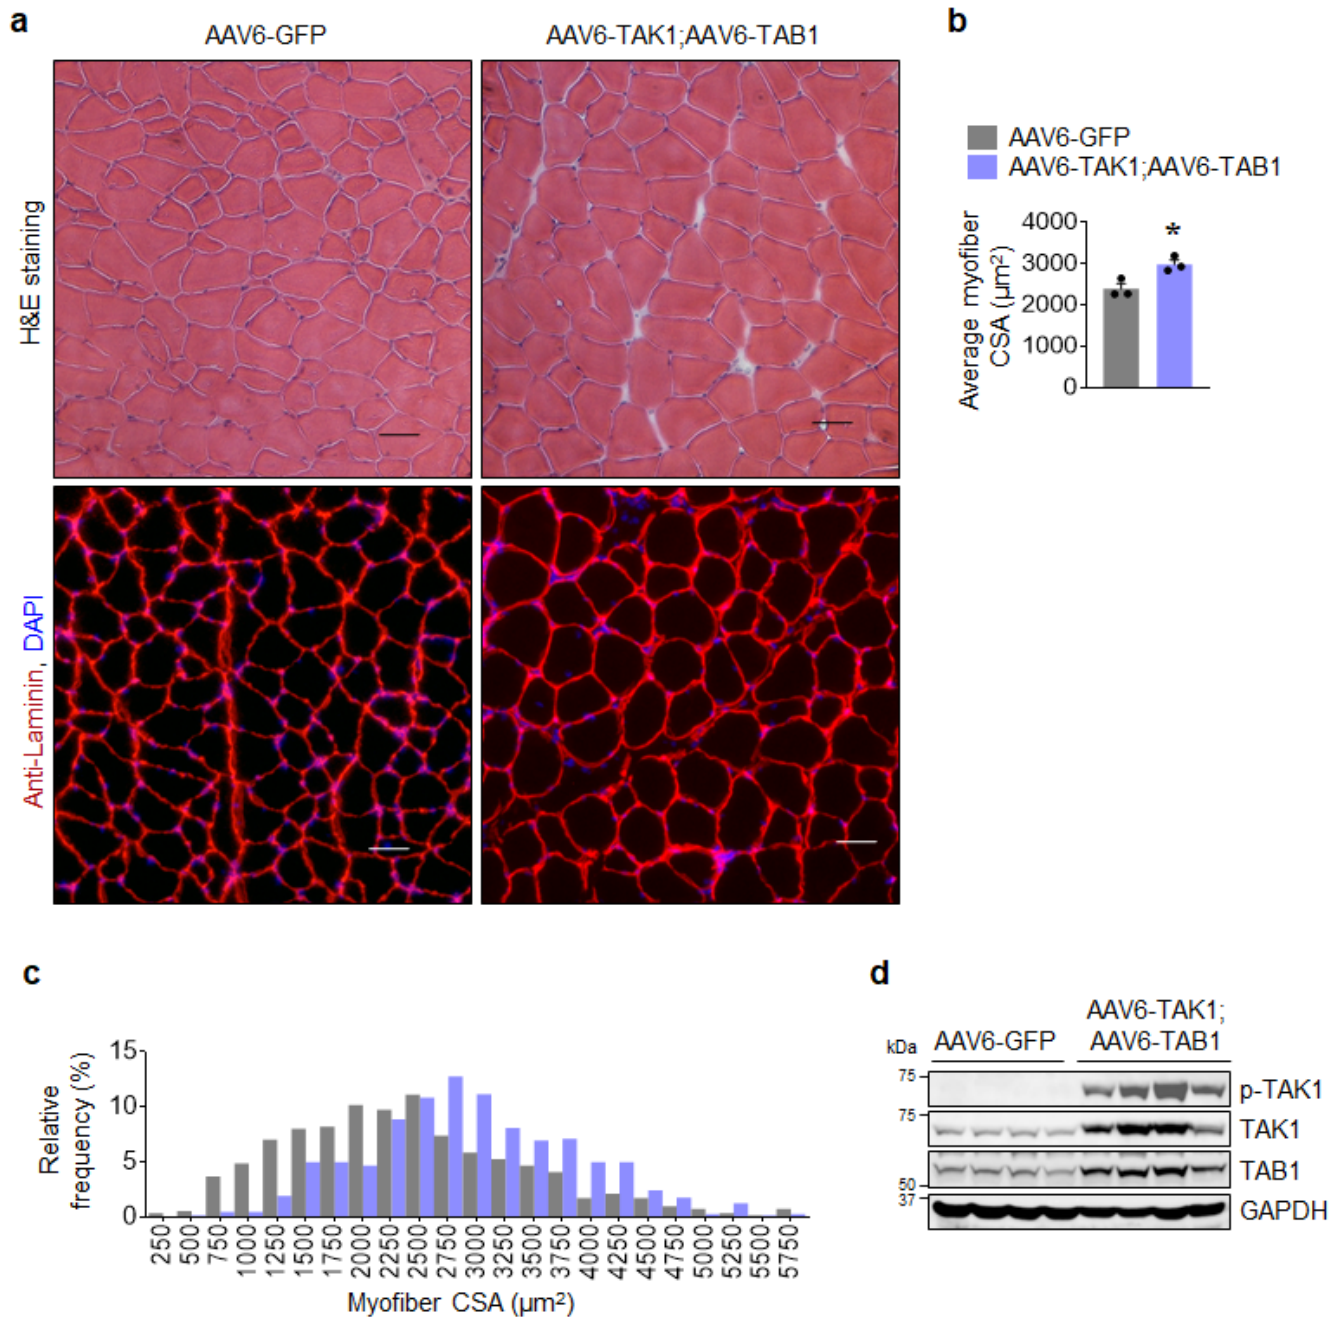

**Supplementary Figure 2. Forced activation of TAK1 induces myofiber hypertrophy in gastrocnemius muscle.** Left side GA muscle of C57BL/6 mice was given intramuscular injection of a combination of AAV6-TAB1 ( $1.25 \times 10^{10}$  vg) and AAV6-TAK1 ( $1.25 \times 10^{10}$  vg) while the contralateral right TA muscle was injected with AAV6-GFP ( $2.5 \times 10^{10}$  vg) particles. After 28 days, the mice were euthanized and the GA muscle was harvested and analyzed. **(a)**

Representative photomicrographs of GA muscle transverse sections after H&E staining or anti-laminin and DAPI staining. Scale bar, 50  $\mu\text{m}$ . **(b)** Average myofiber cross-sectional area (CSA) in GA muscle of mice injected with AAV6-GFP or a combination of AAV-TAK1 and AAV-TAB1. n=3 mice in each group. **(c)** Relative frequency distribution of myofiber CSA in GA muscle injected with AAV6-GFP or combination of AAV6-TAK1 and AAV6-TAB1. n= 4 mice in each group. **(d)** Immunoblots presented here demonstrate levels of p-TAK1 and total TAK1, TAB1, and GAPDH protein in GA muscle of mice after 28 days of intramuscular injection of AAVs. N=4 in each group. Results are presented as mean  $\pm$  SEM. \*p<0.05, values significantly different from contralateral GA muscle injected with AAV6-GFP alone by unpaired *t*-test.

### Supplementary Figure 3

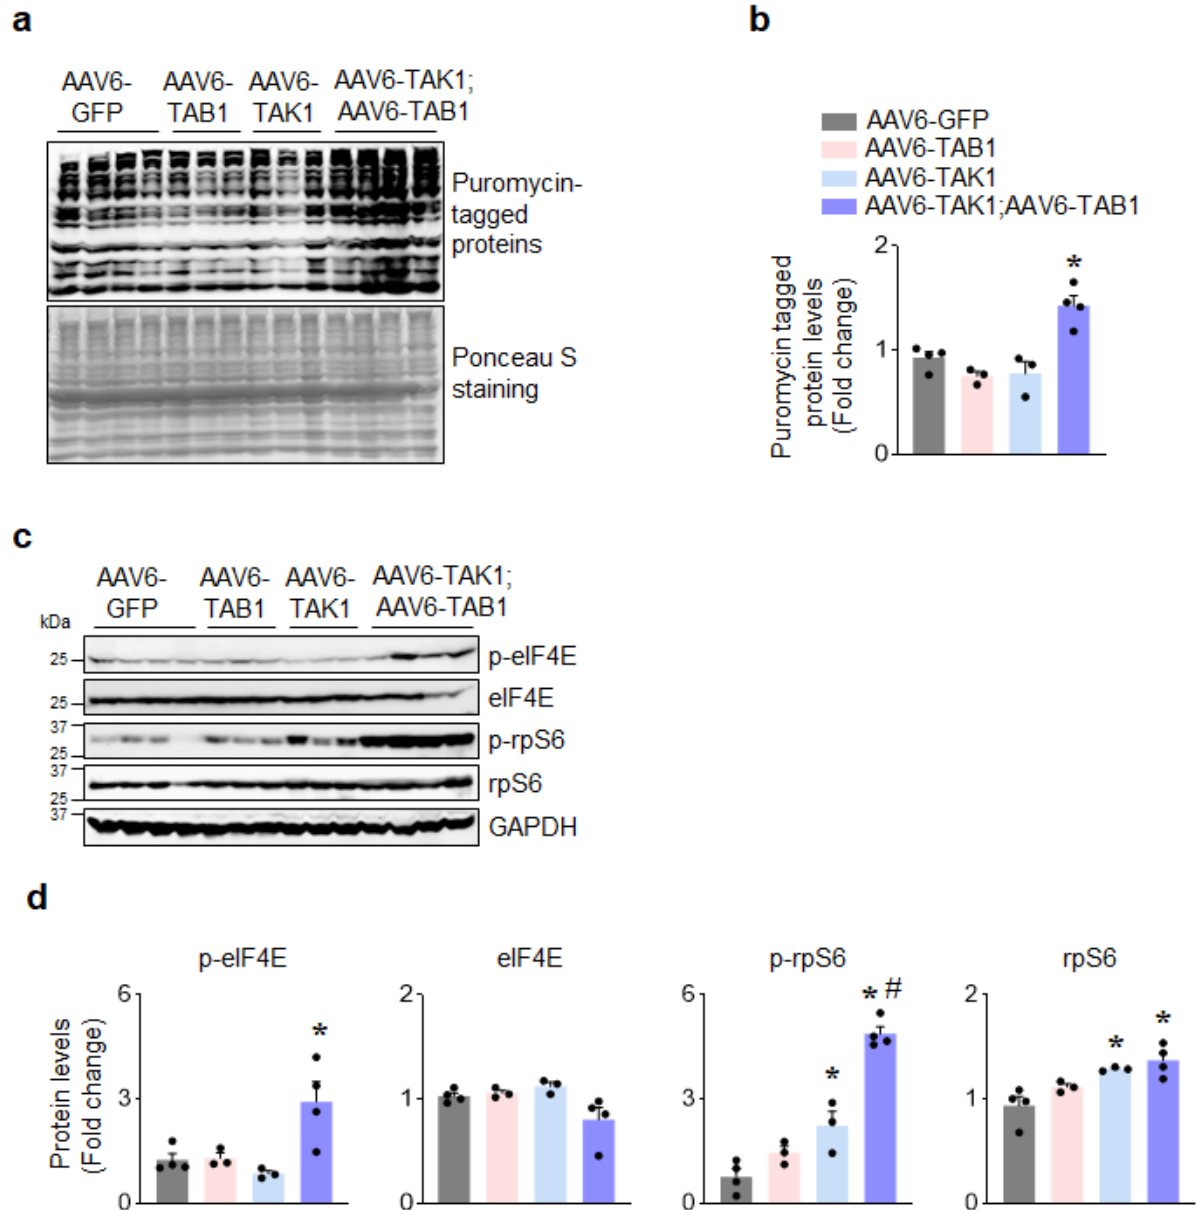

**Supplementary Figure 3. Forced activation of TAK1 induces protein synthesis in skeletal muscle of mice.** Left side TA muscle of C57BL/6 mice was given intramuscular injection of AAV6-TAB1 ( $2.5 \times 10^{10}$  vg), AAV6-TAK1 ( $2.5 \times 10^{10}$  vg), or a combination of AAV6-TAB1 ( $1.25 \times 10^{10}$  vg) and AAV6-TAK1 ( $1.25 \times 10^{10}$  vg) while the contralateral right TA muscle was injected with AAV6-GFP ( $2.5 \times 10^{10}$  vg) particles. At day 28, the mice were given

intraperitoneal injection of puromycin and 30 min later the mice were euthanized and TA muscle was harvested for analysis. **(a)** Representative immunoblot **(b)** densitometry analysis of puromycin-tagged protein in TA muscle of mice injected with AAV6-GFP, AAV6-TAB1, AAV6-TAK1 or combination of AAV6-TAB1 and AAV6-TAK1. **(c)** Representative immunoblots, and **(d)** densitometry analysis of levels of p-eIF4E, eIF4E, p-rpS6, and rpS6 in protein in TA muscle of mice injected with AAV6-GFP, AAV6-TAB1, AAV6-TAK1, or combination of AAV6-TAB1 and AAV6-TAK1. N=3-4 in each group. Results are presented as mean  $\pm$  SEM. \* $p < 0.05$ , values significantly different from TA muscle injected with AAV6-GFP alone by unpaired *t*-test. # $p < 0.05$ , values significantly different from TA muscle injected with AAV6-TAK1 alone by unpaired *t*-test.

### Supplementary Figure 4

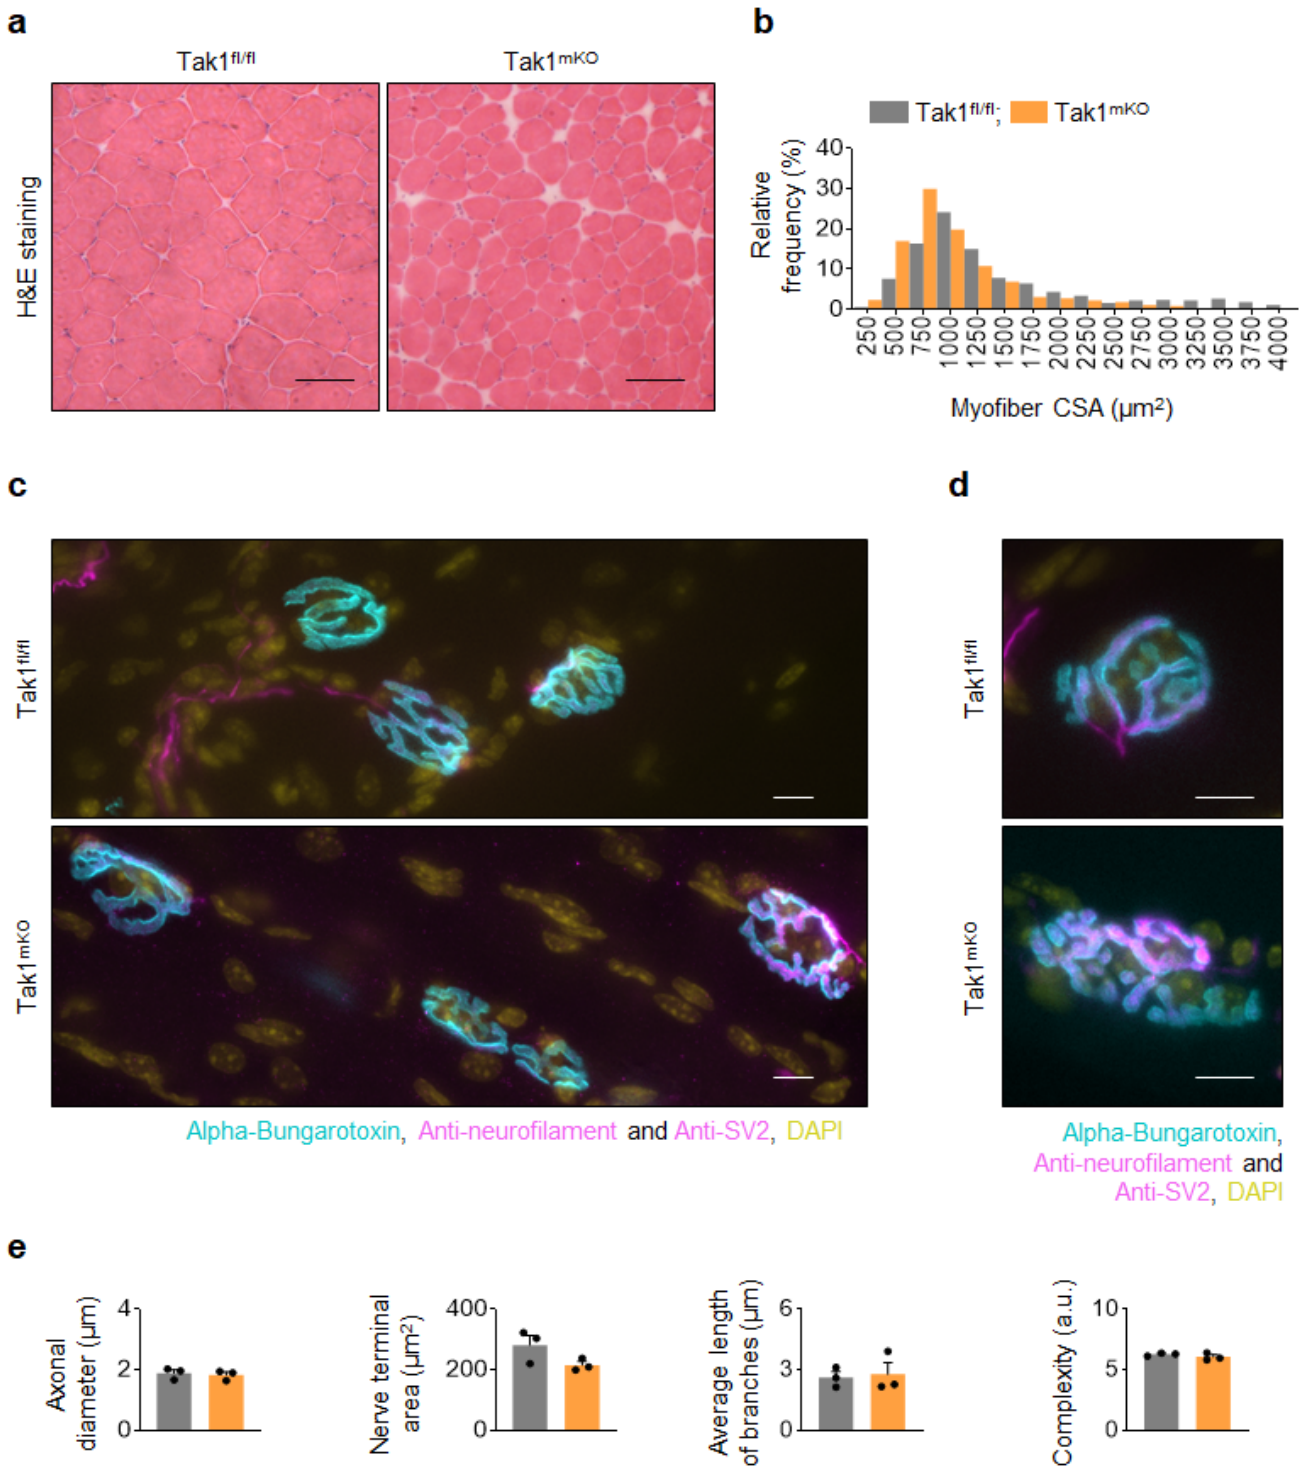

### Supplementary Figure 4. Role of TAK1 in regulation of muscle mass and NMJs.

Littermate Tak1<sup>fl/fl</sup> and Tak1<sup>mKO</sup> mice were administered with tamoxifen i.p. (75mg/kg



bodyweight) for 4 days and then fed with tamoxifen containing diet for 24 days to delete Tak1 gene. **(a)** Representative photomicrograph of H&E-stained TA muscle transverse sections. Scale bar, 50  $\mu\text{m}$ . **(b)** Percent relative frequency of myofiber CSA in TA muscle of Tak1<sup>fl/fl</sup> and Tak1<sup>mkO</sup> mice. Representative immunofluorescence images of NMJ at **(c)** lower and **(d)** higher magnification in Tak1<sup>fl/fl</sup> and Tak1<sup>mkO</sup> mice. Scale bar, 10  $\mu\text{m}$ . **(e)** Presynaptic parameters of NMJ analyzed using ImageJ software. n=3 mice in each group. Results are presented as mean  $\pm$  SEM. No statistically significant differences were observed between Tak1<sup>fl/fl</sup> and Tak1<sup>mkO</sup> mice by unpaired t-test.

## Supplementary Figure 5

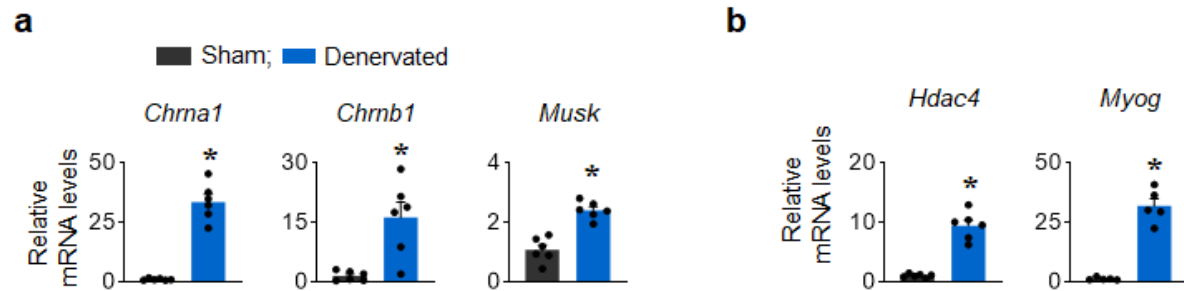

**Supplementary Figure 5. Increased expression of NMJ components in denervated muscle.** Adult C57BL6 mice were subjected sham or denervation surgery. After 7 days, GA muscle was isolated and analyzed by qPCR. Relative mRNA levels of (a) *Chrna1* (AChR $\alpha$ ), *Chrn1* (AChR $\beta$ ), *Musk* and (b) *Hdac4* and *Myog* in sham and denervated muscle GA muscle. n=4-6 in each group. Results are presented as mean  $\pm$  SEM. \*p<0.05, values significantly different from undenervated (sham-operated) muscle by unpaired *t*-test.

### Supplementary Figure 6

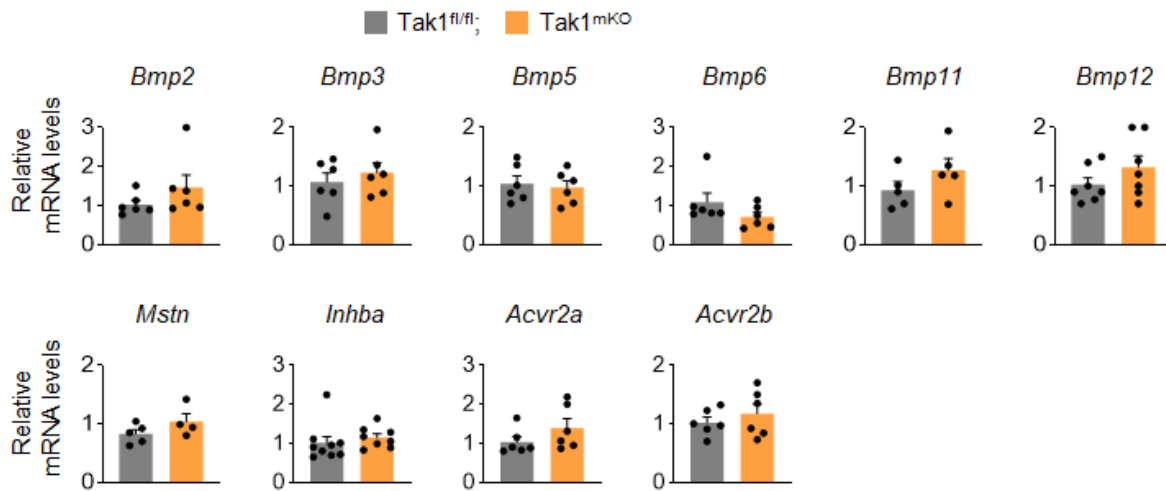

**Supplementary Figure 6. Effect of inactivation of TAK1 on gene expression of BMP and TGF $\beta$  subfamily molecules.** Relative mRNA levels of *Bmp2*, *Bmp3*, *Bmp5*, *Bmp6*, *Bmp11*, *Bmp12*, *Mstn* (myostatin), *Inhba* (inhibin beta A), *Acvr2a* receptor and *Acvr2b* receptor in GA muscle of Tak1<sup>fl/fl</sup> and Tak1<sup>mKO</sup> mice assayed by qPCR. n=5-9 per group. Data presented here are mean  $\pm$ SEM. No statistically significant differences were observed between Tak1<sup>fl/fl</sup> and Tak1<sup>mKO</sup> mice by unpaired t-test.

## Supplementary Figure 7

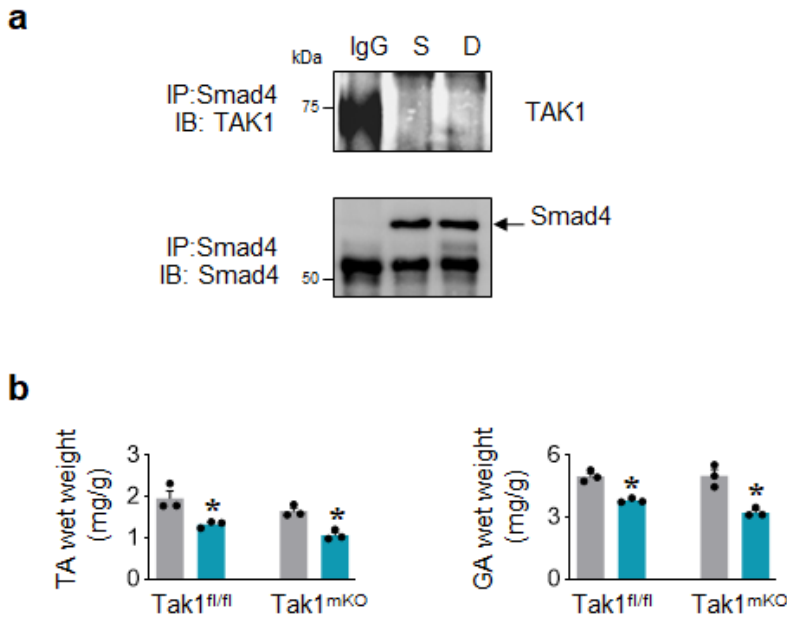

**Supplementary Figure 7. TAK1 regulates Smad signaling in denervated muscle.** C57BL/6 mice were subjected to sham or denervation surgery for 7d followed by isolation of hind limb muscle and biochemical analysis. **(a)** Immunoblots after immunoprecipitation of GA muscle extracts with Smad4 antibody followed by immunoblotting with TAK1 or Smad4 antibody. **(b)** Tak1<sup>fl/fl</sup> and Tak1<sup>mKO</sup> mice were administered with tamoxifen i.p. (75mg/kg bodyweight) for 4 days and were fed tamoxifen containing diet thereafter. At day 7 after first tamoxifen injection, the left hind leg was denervated by transecting the sciatic nerve whereas sham surgery was performed on the right leg. After 7 days, hind limb muscles were harvested and analyzed. Wet weight of sham-operated and 7d-denervated TA, and GA muscle normalized with body weight of Tak1<sup>fl/fl</sup> and Tak1<sup>mKO</sup> mice. Data presented here are mean  $\pm$ SEM. \* $p < 0.05$ , values significantly different from corresponding sham-operated muscle by two-way ANOVA followed by Tukey's multiple comparison test.

## Supplementary Figure 8

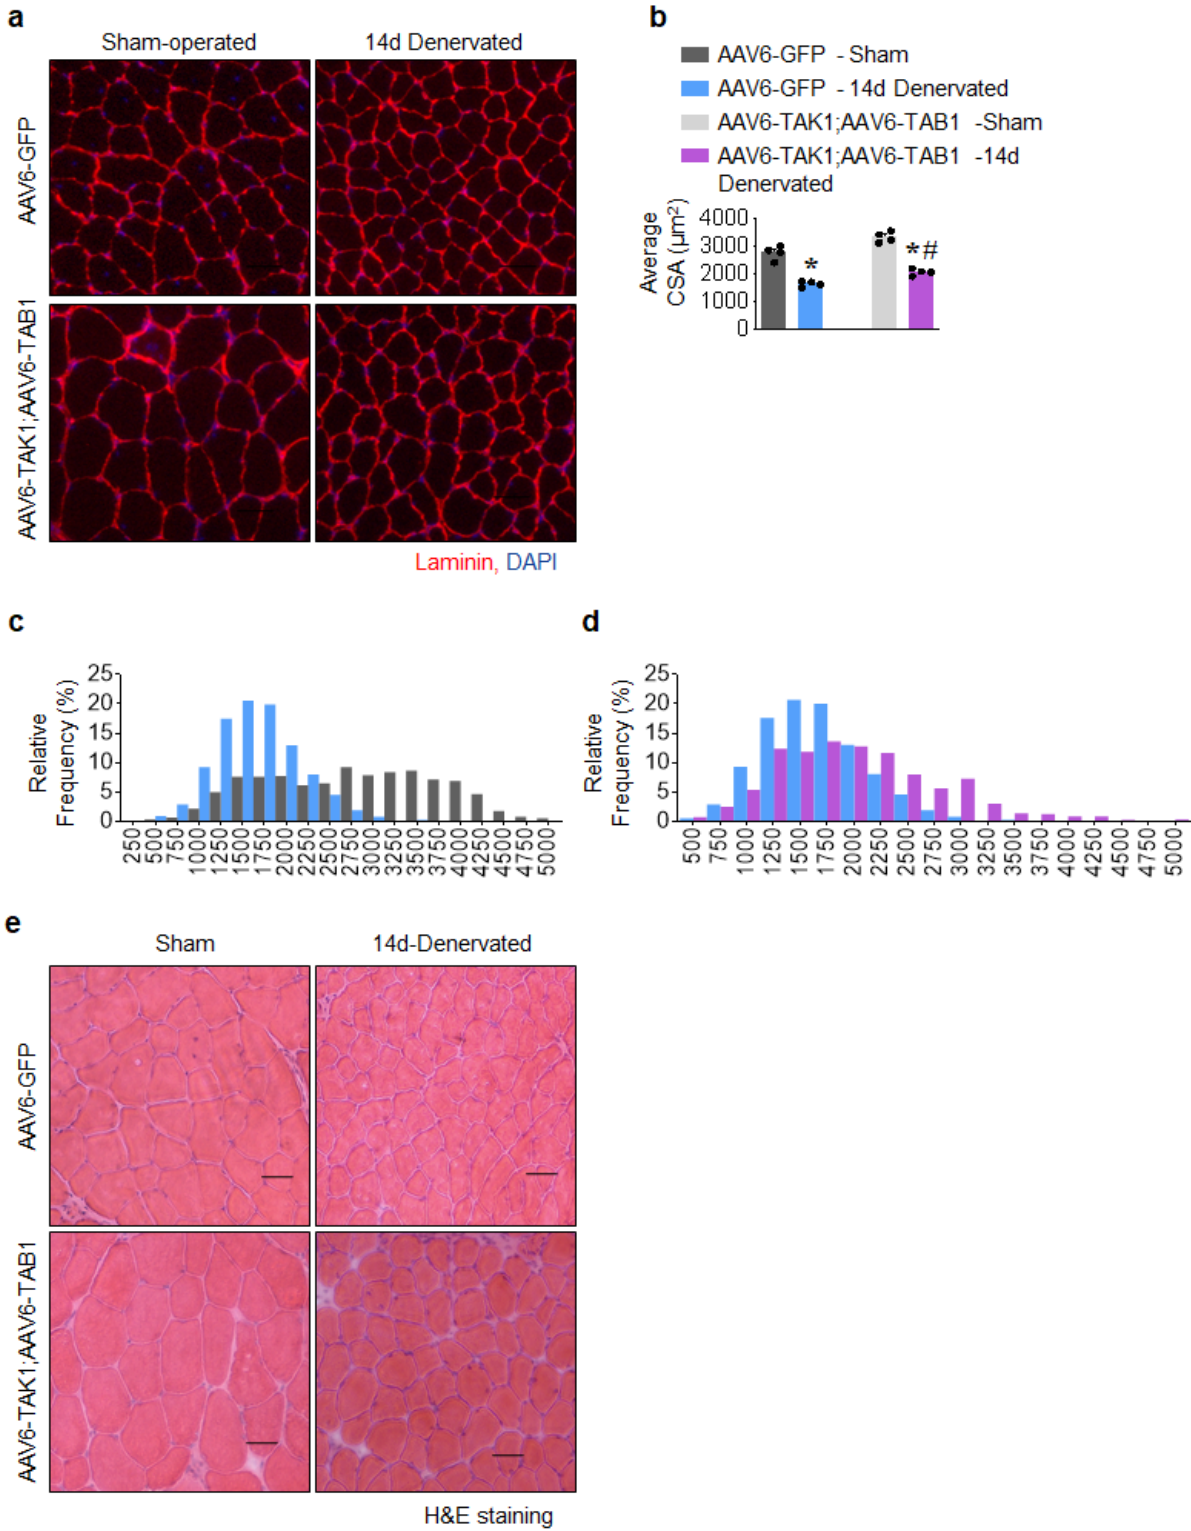

**Supplementary Figure 8. Forced activation of TAK1 mitigates denervation-induced muscle atrophy.** Both side TA muscle of adult wild-type mice were given intramuscular

injection of AAV-GFP ( $2.5 \times 10^{10}$  vg) or a combination of AAV-TAK1 ( $1.25 \times 10^{10}$  vg) and AAV-TAB1 ( $1.25 \times 10^{10}$  vg) particles. After 14 days, the left hind muscles of the mice were denervated whereas right side was sham operated. On day 14 post denervation, the mice were euthanized and TA muscles were harvested and analyzed. **(a)** Representative photomicrographs of TA muscle sections after staining with anti-laminin and DAPI. Scale bar, 50  $\mu$ m. **(b)** Average myofiber cross sectional area (CSA) in sham and 14d-denervated TA muscle injected with AAV6-GFP or combination of AAV6-TAK1 and AAV6-TAB1. **(c)** Relative frequency distribution of myofiber CSA expressed as percentage in sham and 14d-denervated TA muscles injected with AAV6-GFP. **(d)** Relative frequency distribution of myofiber CSA in 14d-denervated TA muscles injected with AAV6-GFP compared with 14d-denervated TA muscle co-injected with AAV6-TAK1 and AAV6-TAB1. **(e)** Representative H&E-stained images of sham and 14d-denervated TA muscle sections injected with AAV6-GFP or a combination of AAV6-TAK1 and AAV6-TAB1. N=4 in each group. Data are presented as mean  $\pm$ SEM and was analyzed by two-way ANOVA followed by Tukey's multiple comparison test. \* $p < 0.05$ , values significantly different from corresponding control sham-operated TA muscle. # $p < 0.05$ , values significantly different from 14d-denervated TA muscle injected with AAV6-GFP.

# Supplementary Figure 9

## Figure 1a

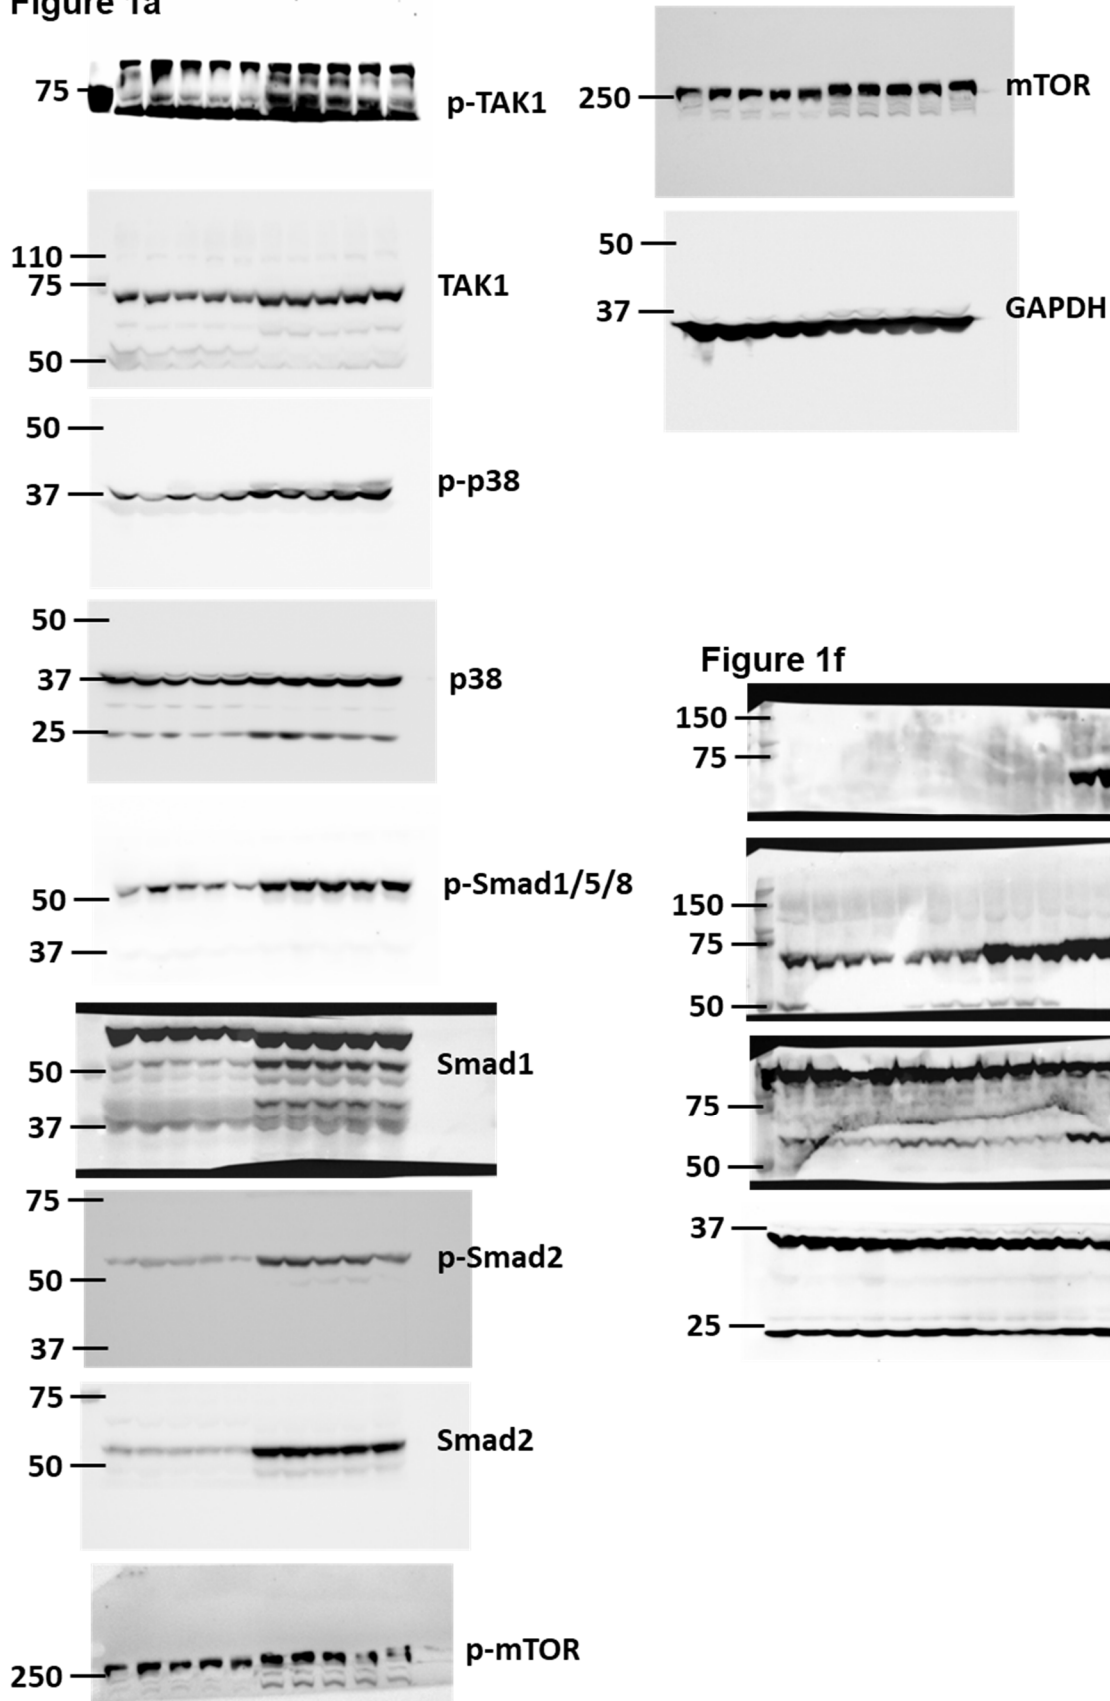

## Figure 1f

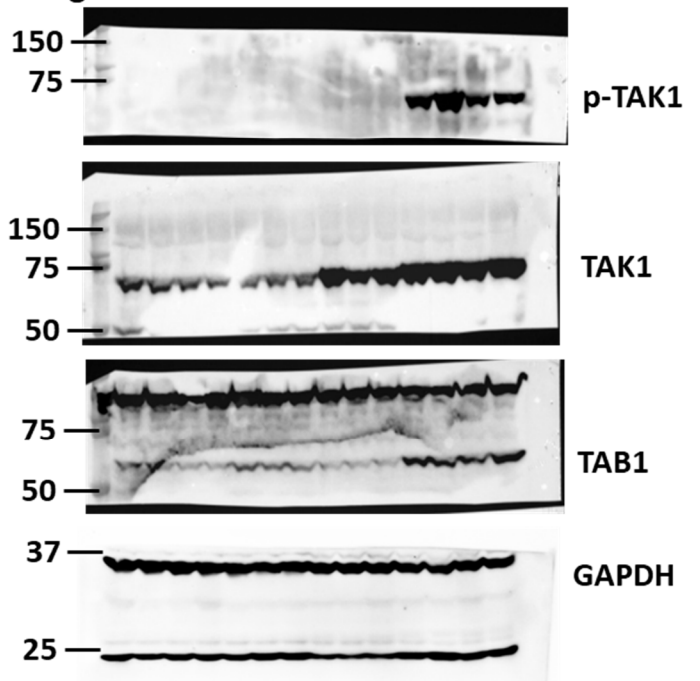

Supplementary Figure 9 contd.

Figure 2a

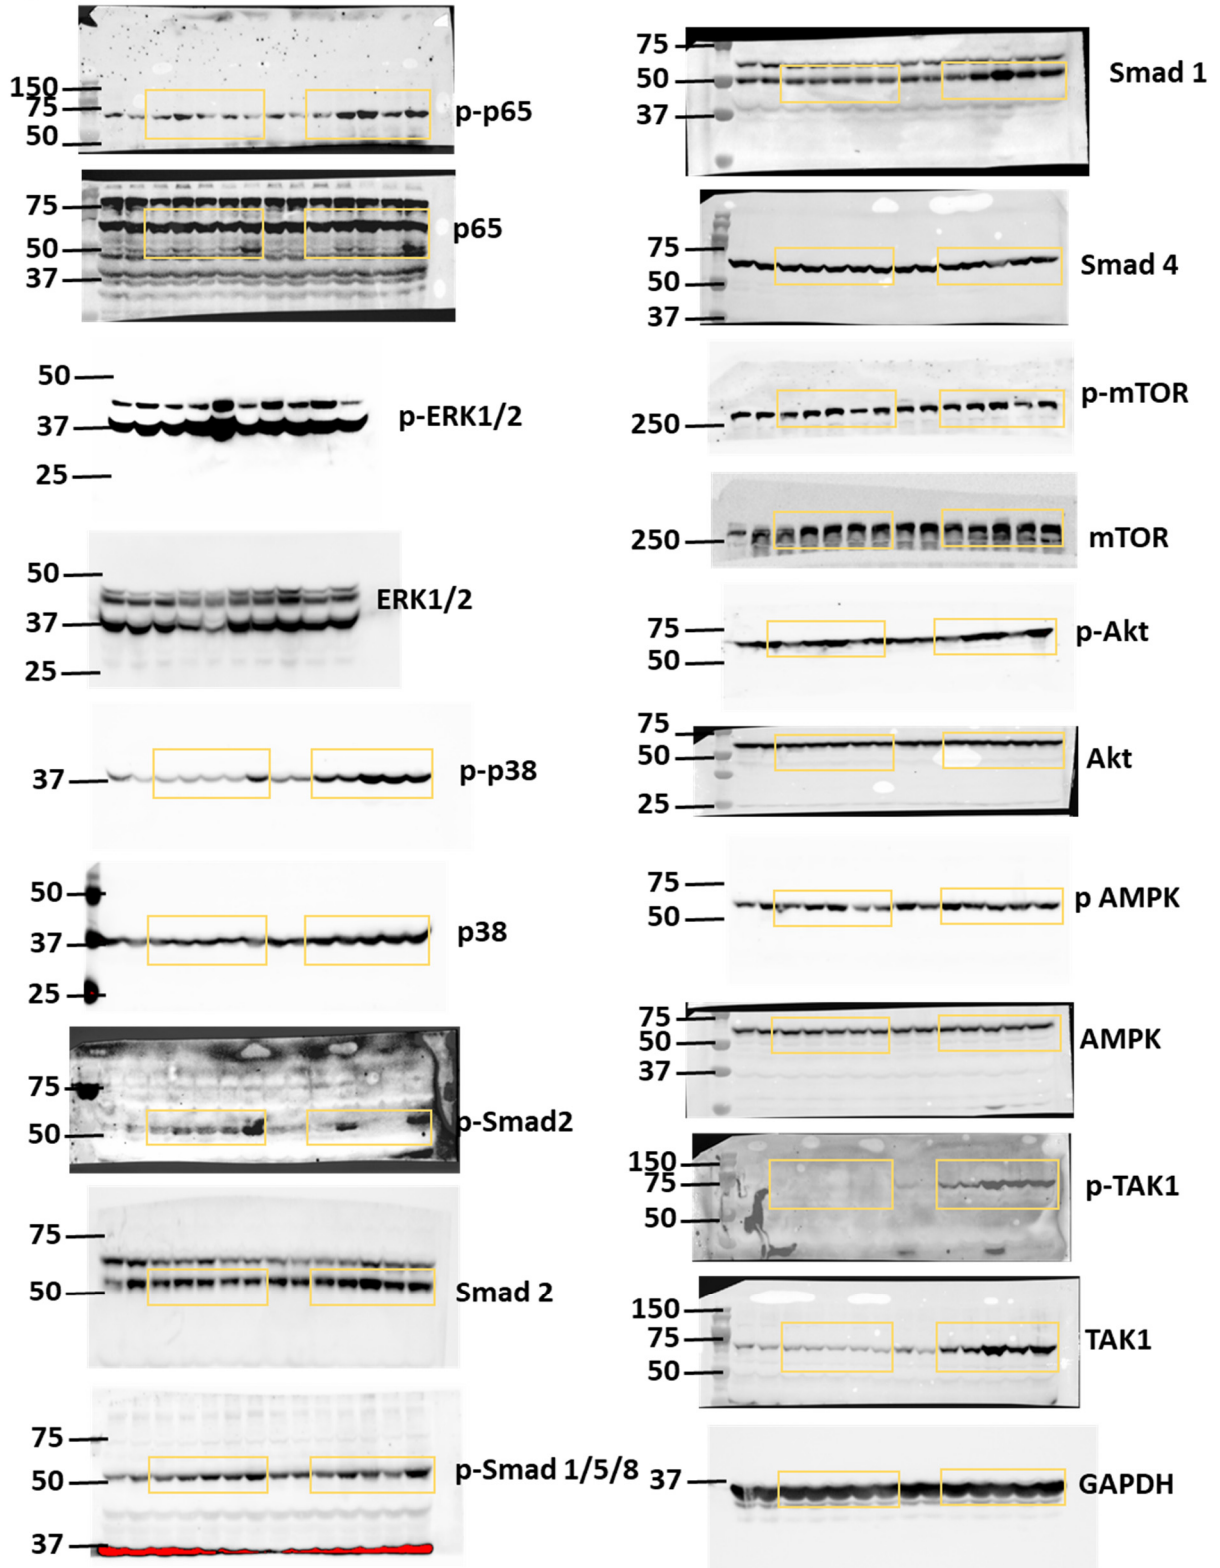



Supplementary Figure 9 contd.

Figure 2b

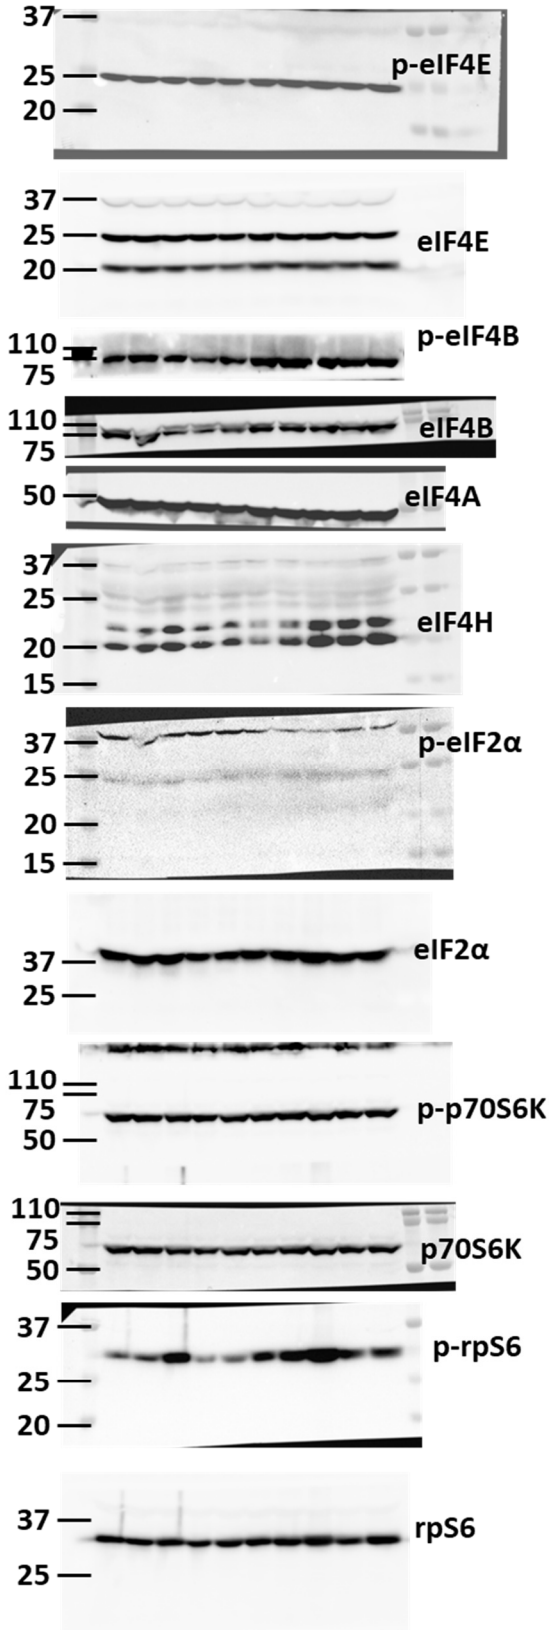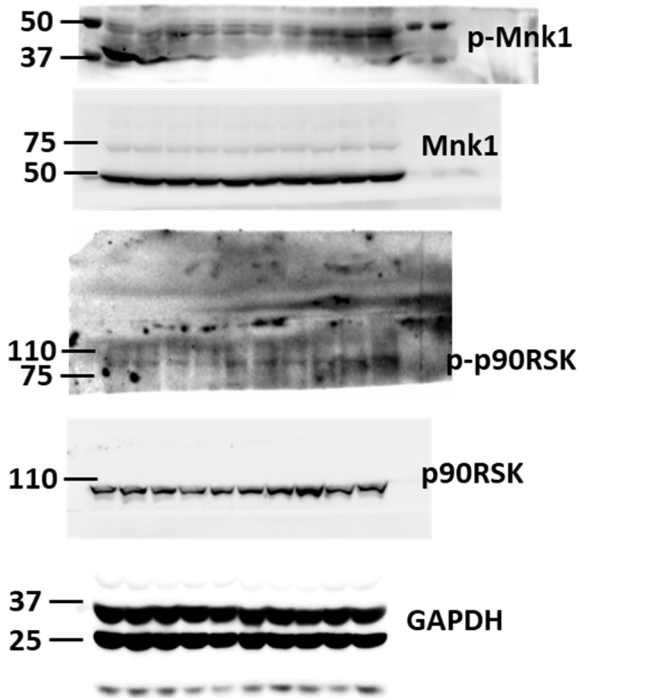

Figure 3b.

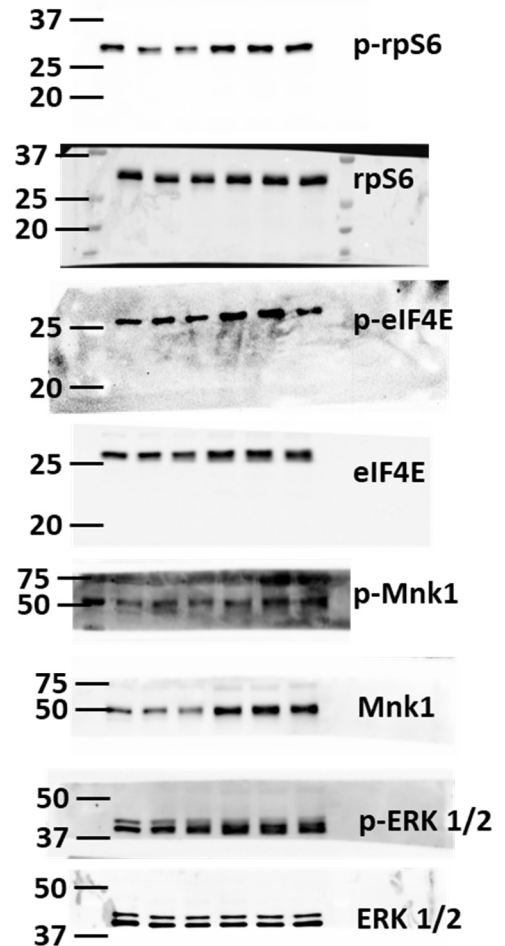

Supplementary Figure 9 contd.  
Figure 3b contd.

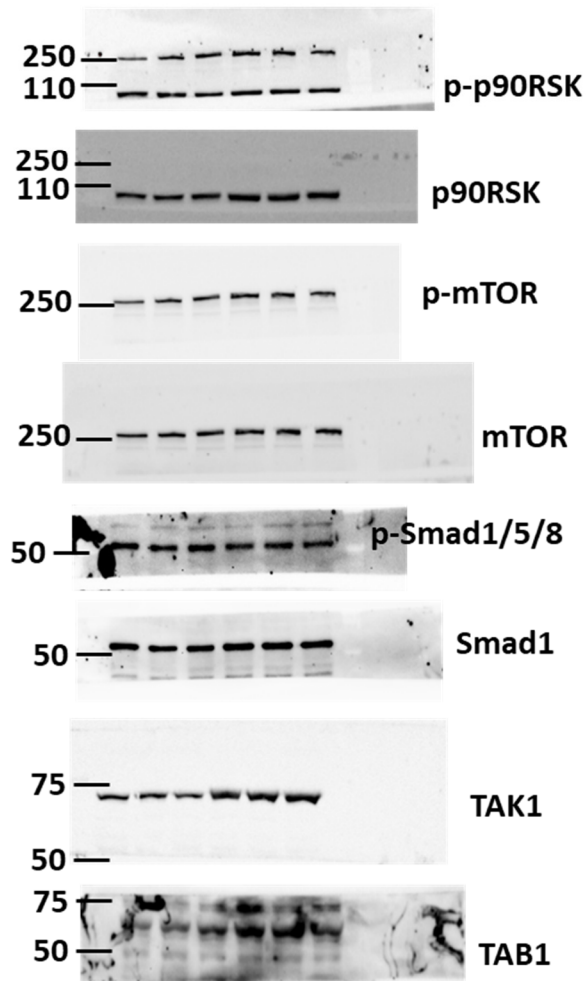

Figure 3d.

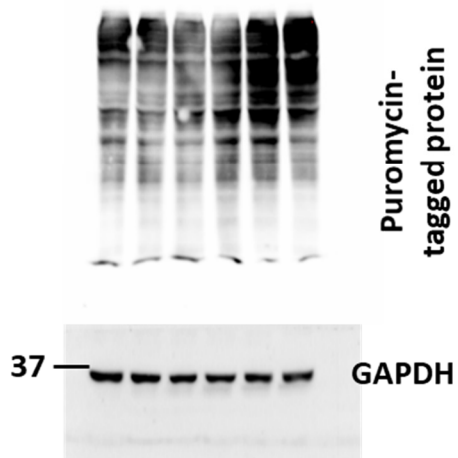

Figure 3f.

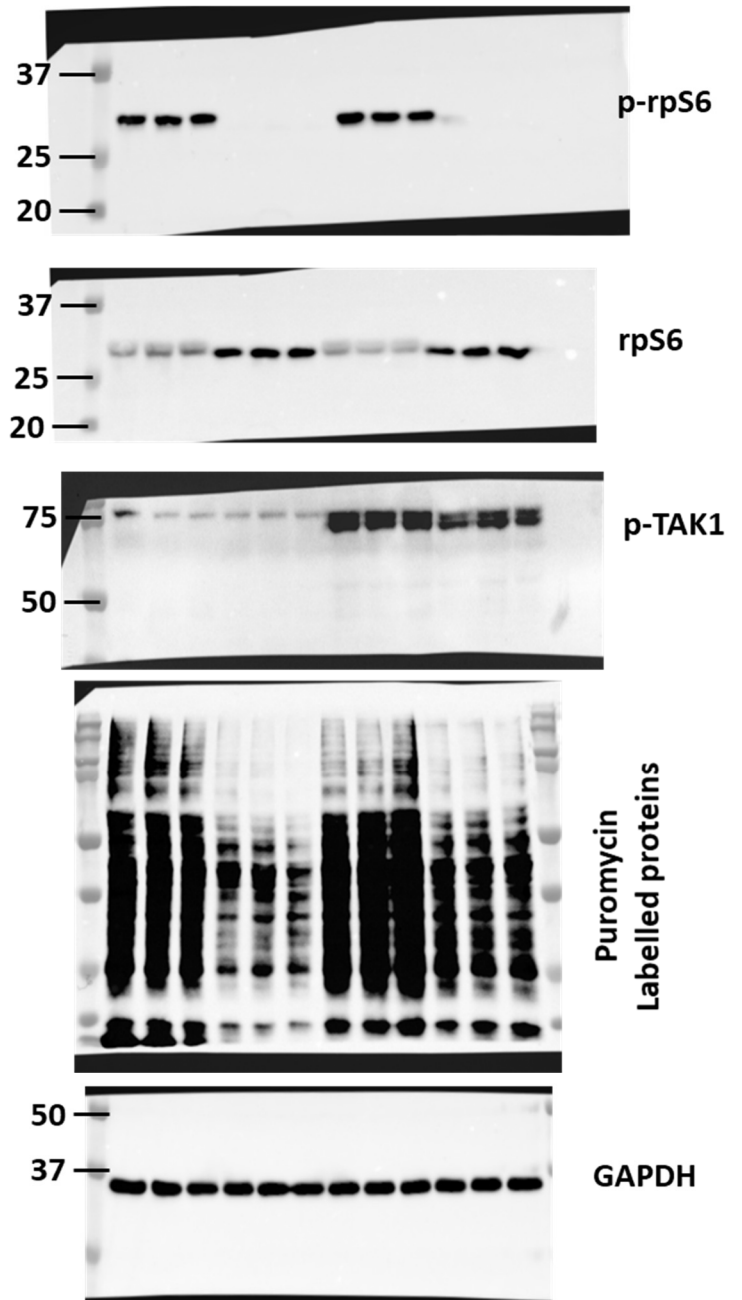

Supplementary Figure 9 contd.

Figure 4e.

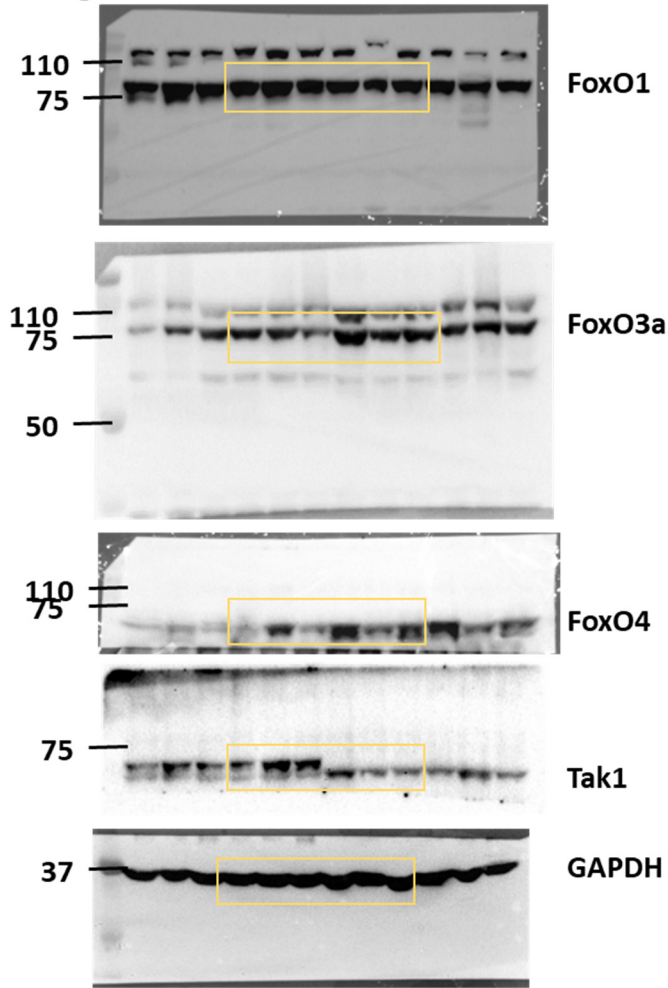

Figure 4h.

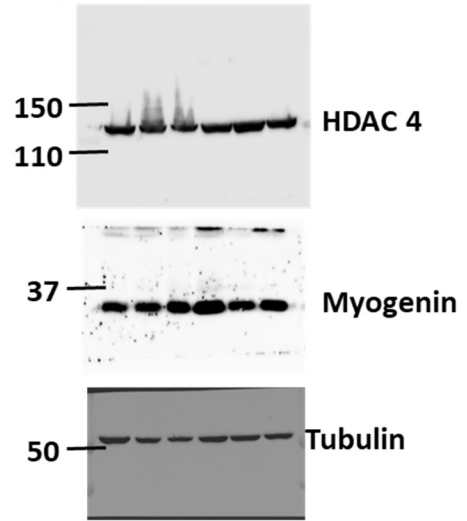

Figure 5a.

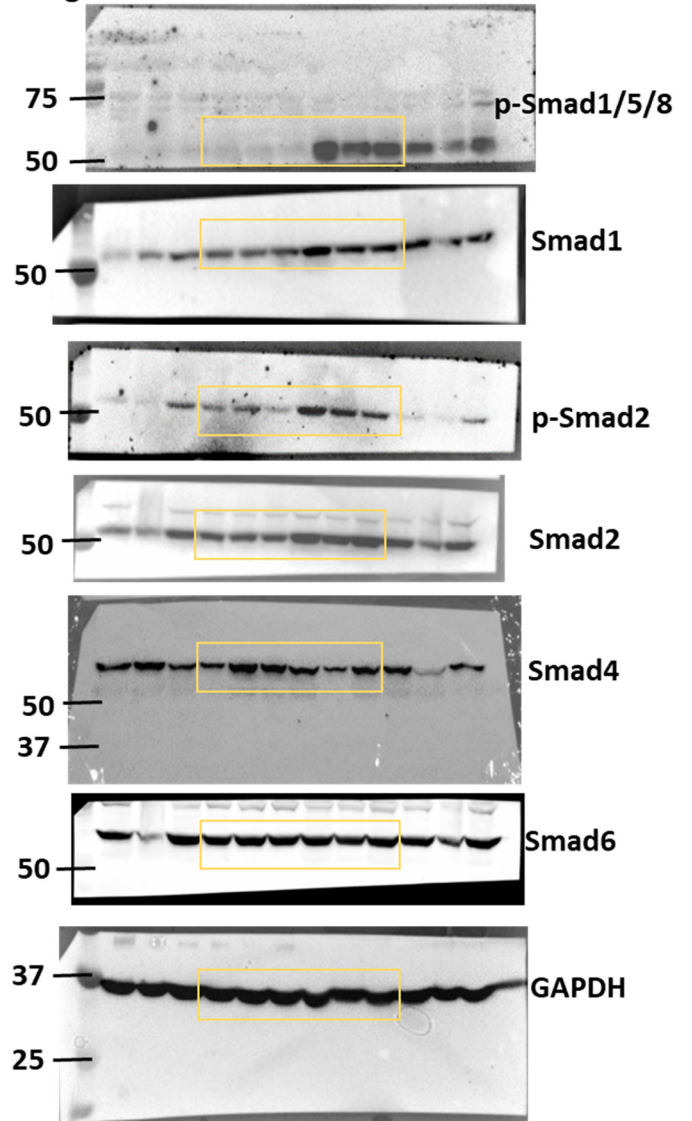

Supplementary Figure 9 contd.

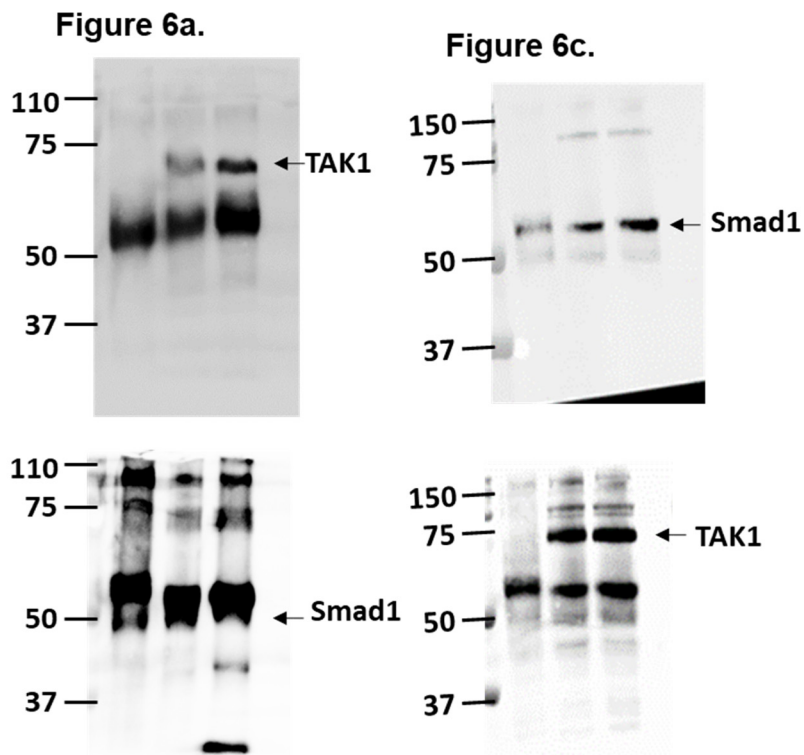

Figure 6d.

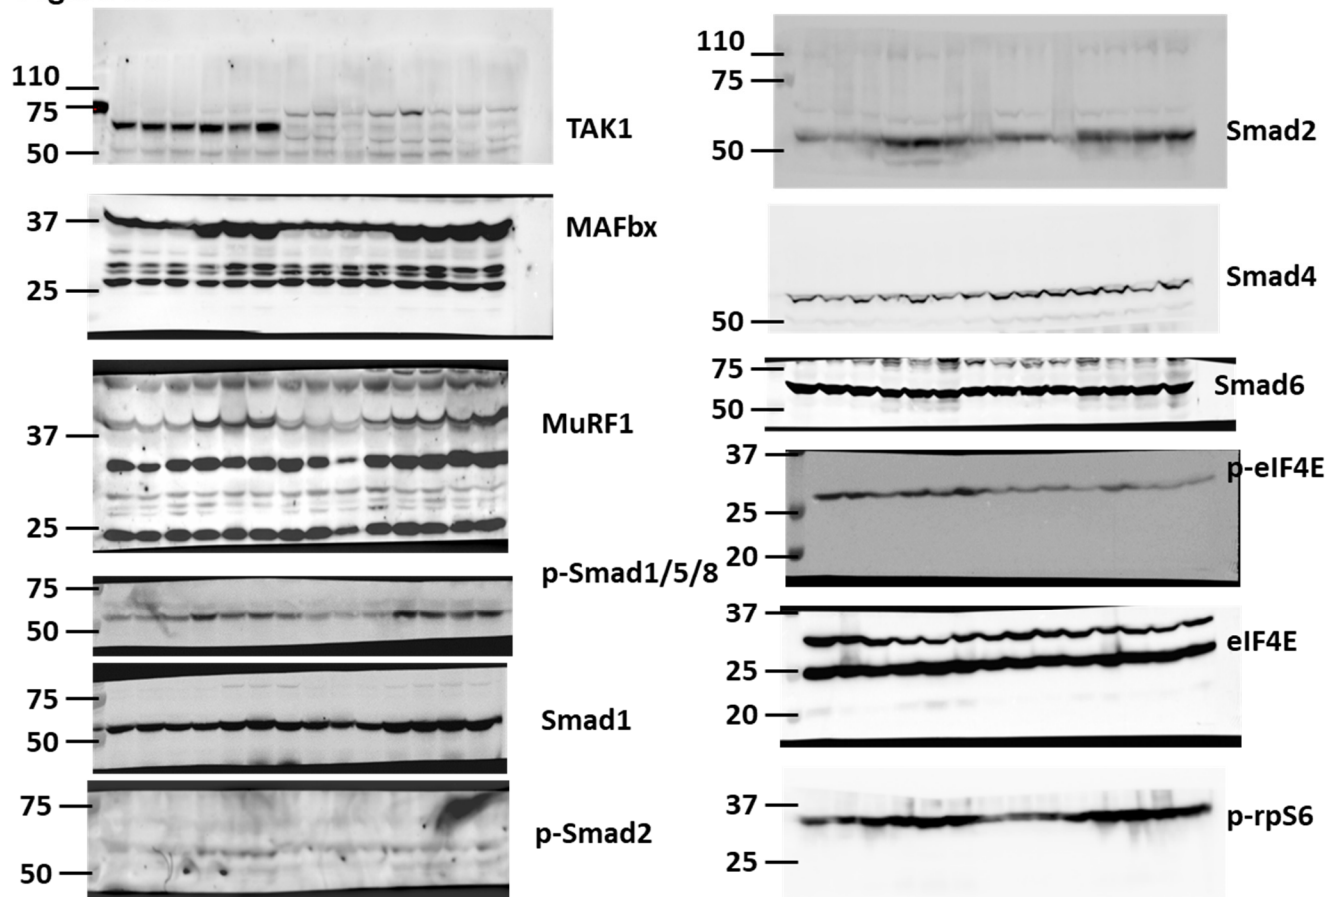

Supplementary Figure 9 contd.

Figure 6d contd.

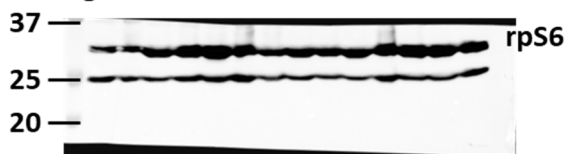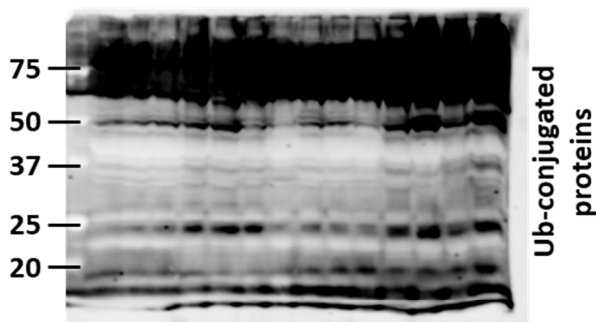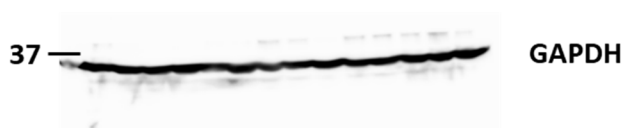

Figure 7b.

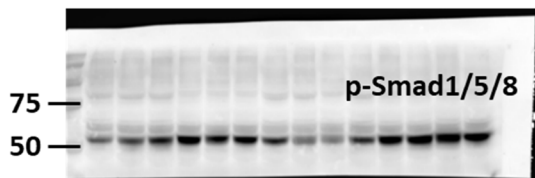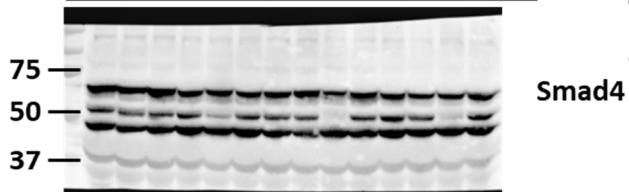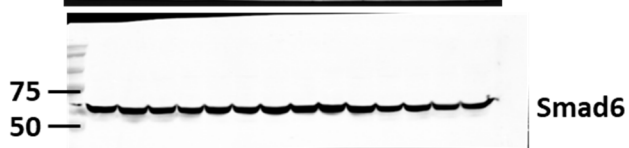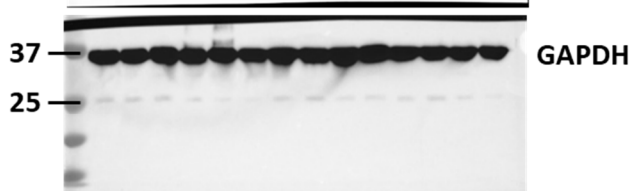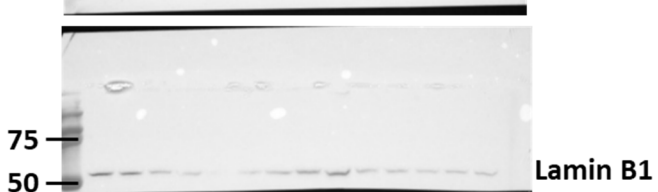

Figure 7a.

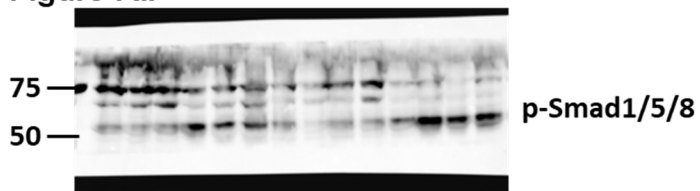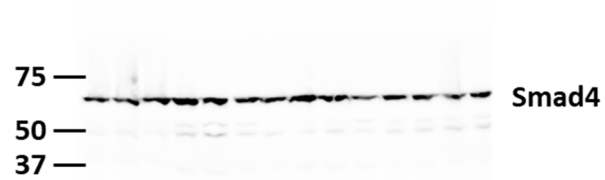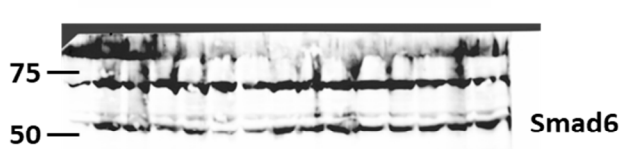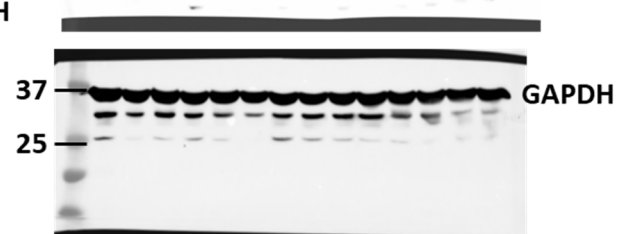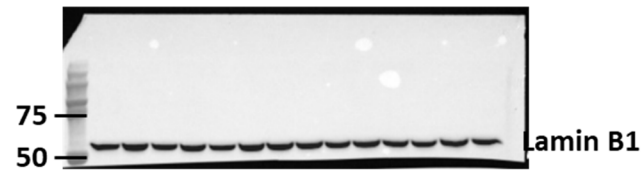

Supplementary Figure 9 contd.

Figure 8c.

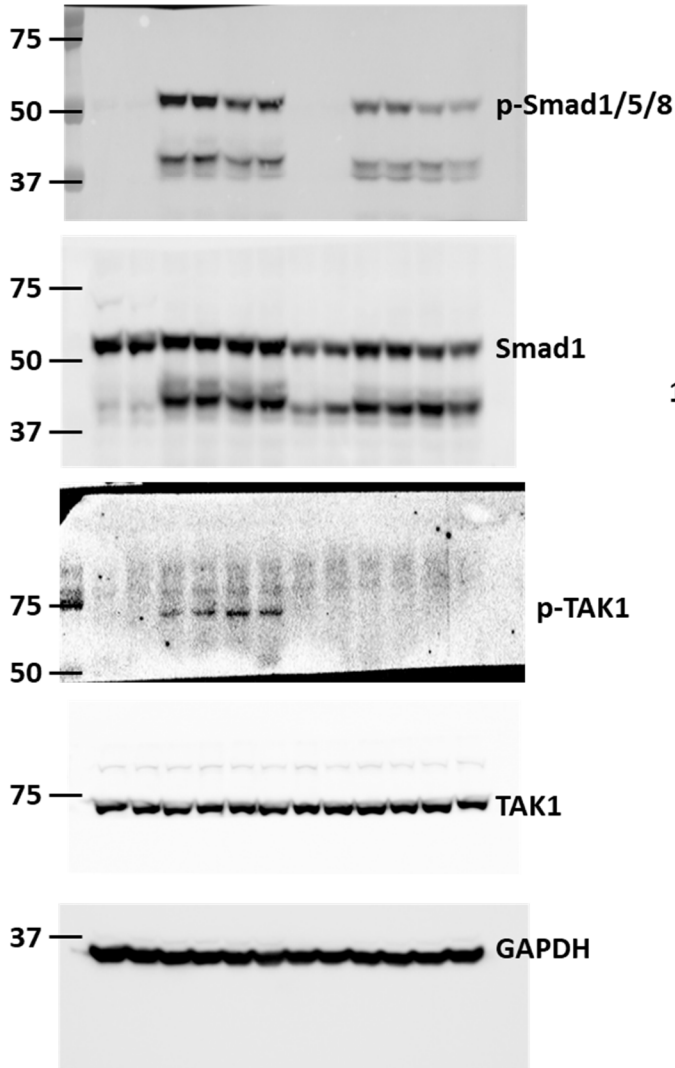

Figure 8f.

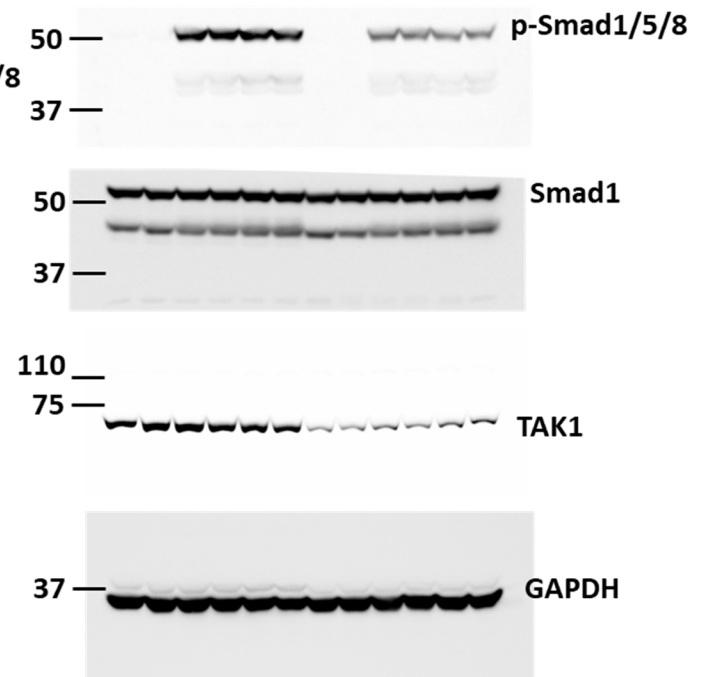

Supplementary Figure 9 contd.

Figure 9g.

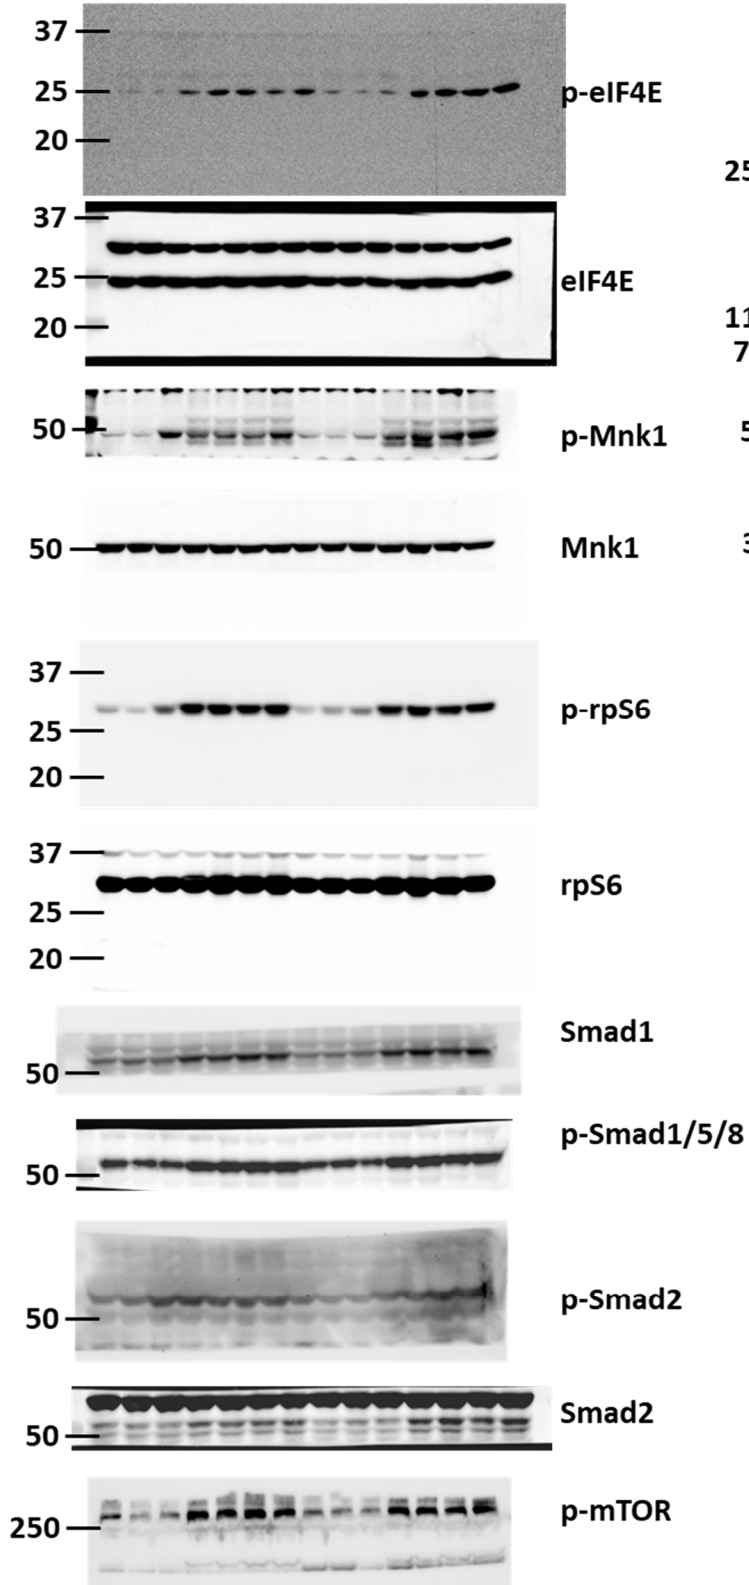

Figure 9g. Contd.

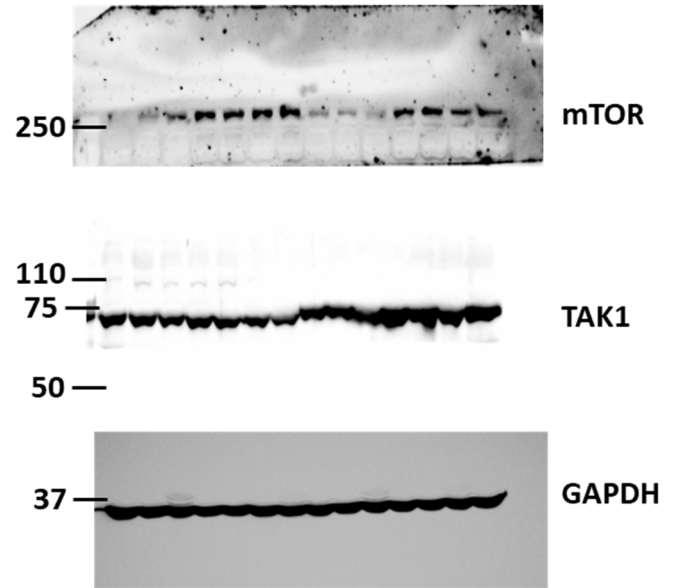

Figure S2d.

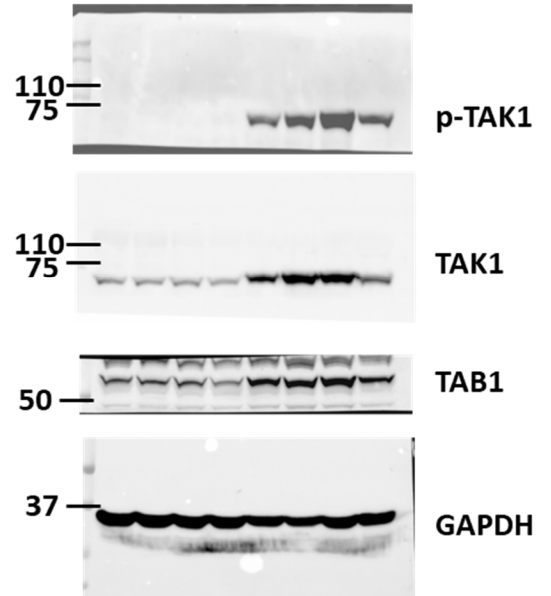

Supplementary Figure 9 contd.

Figure S3b.

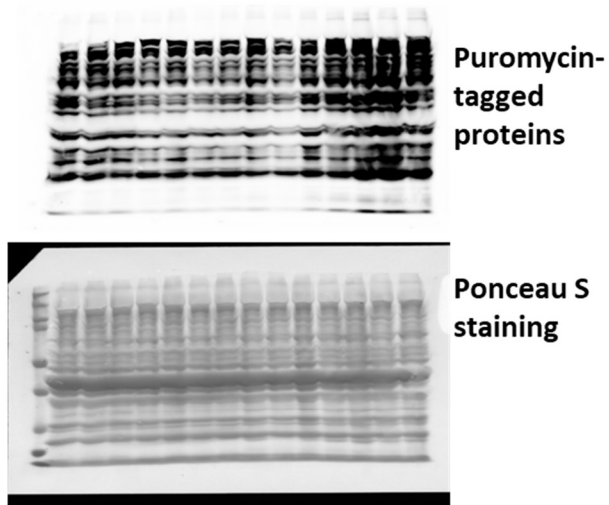

Figure S3c.

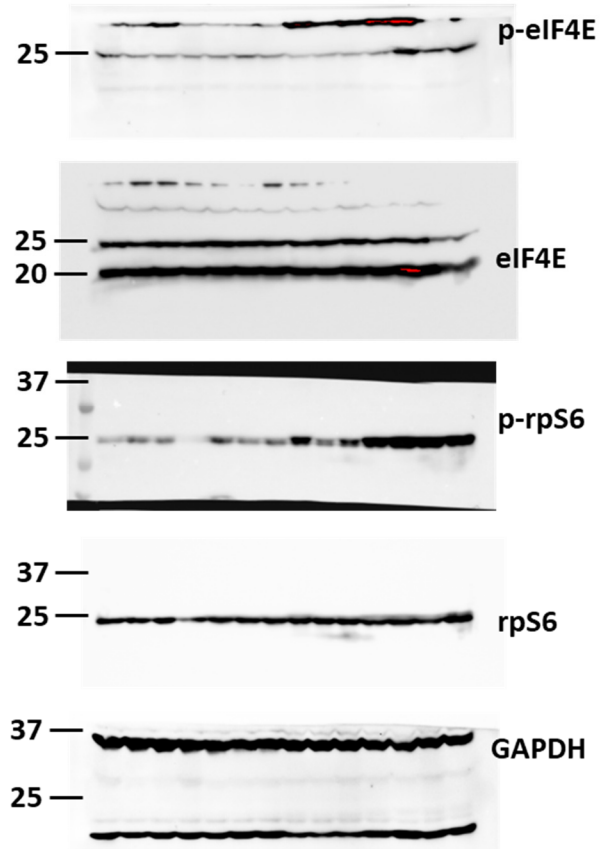

Figure S7a.

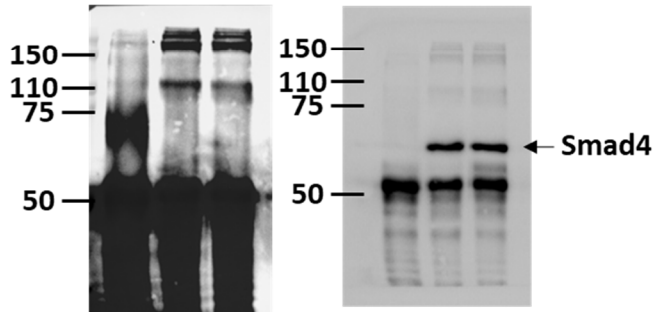

**Supplementary Figure 9. Uncropped images of immunoblots used in the manuscript.**

Original uncropped images of the immunoblots as displayed in the main and supplemental figures of the manuscript are presented here. Yellow rectangle boxes were used to mark indicated bands where multiple bands appear in the same immunoblot. Molecular weight markers are presented on the left side of the immunoblots.



**Supplementary Table 1.** Antibodies used in the study.

| <b>Antibody</b>                                     | <b>Source and Catalog no.</b>     |
|-----------------------------------------------------|-----------------------------------|
| Monoclonal rabbit-anti-phospho-TAK1                 | Invitrogen #MA5-15073             |
| Monoclonal rabbit-anti-total-TAK1                   | Cell Signaling Technology, # 5206 |
| Monoclonal rabbit-anti-phospho-p38 MAPK             | Cell Signaling Technology, # 4511 |
| Polyclonal rabbit-anti-total-p38 MAPK               | Cell Signaling Technology, # 9212 |
| Monoclonal rabbit-anti-phospho-Smad1/5/9            | Cell Signaling Technology # 13820 |
| Monoclonal rabbit-anti-total-Smad1                  | Cell Signaling Technology # 6944  |
| Monoclonal rabbit-anti-phospho-Smad2                | Cell Signaling Technology # 3108  |
| Monoclonal rabbit-anti-total-Smad2                  | Cell Signaling Technology # 5339  |
| Polyclonal rabbit-anti-phospho-mTOR                 | Cell Signaling Technology # 2971  |
| Polyclonal rabbit-anti-total-mTOR                   | Cell Signaling Technology # 2972  |
| Monoclonal rabbit-anti-GAPDH                        | Cell Signaling Technology # 2118  |
| Monoclonal rabbit-anti-phospho-p65 NF- $\kappa$ B   | Cell Signaling Technology # 3033  |
| Monoclonal rabbit-anti-total-p65 NF- $\kappa$ B     | Cell Signaling Technology # 8242  |
| Polyclonal rabbit-anti-phospho-p44/42 MAPK          | Cell Signaling Technology # 9101  |
| Monoclonal rabbit-anti-total-p44/42 MAPK            | Cell Signaling Technology # 4695  |
| Polyclonal rabbit-anti-Smad4                        | Cell Signaling Technology # 9515  |
| Monoclonal rabbit-anti-phospho-Akt                  | Cell Signaling Technology # 4060  |
| Polyclonal rabbit-anti-total-Akt                    | Cell Signaling Technology # 9517  |
| Monoclonal rabbit-anti-phospho-AMPK $\alpha$        | Cell Signaling Technology # 2535  |
| Polyclonal rabbit-anti-total AMPK $\alpha$          | Cell Signaling Technology # 2532  |
| Polyclonal rabbit-anti-phospho-eIF4E                | Cell Signaling Technology # 9741  |
| Monoclonal rabbit-total-eIF4E                       | Cell Signaling Technology # 2067  |
| Polyclonal rabbit-anti-phospho-eIF4B                | Cell Signaling Technology # 3591  |
| Polyclonal rabbit-total-eIF4B                       | Cell Signaling Technology # 3592  |
| Monoclonal rabbit-eIF4A                             | Cell Signaling Technology # 2013  |
| Monoclonal rabbit-eIF4H                             | Cell Signaling Technology # 3469  |
| Monoclonal rabbit-anti-phospho-eIF2 $\alpha$        | Cell Signaling Technology # 3398  |
| Monoclonal rabbit-anti-total-eIF2 $\alpha$          | Cell Signaling Technology # 5324  |
| Polyclonal rabbit-anti-phospho-p70S6 Kinase         | Cell Signaling Technology # 9208  |
| Polyclonal rabbit-anti-total-p70S6 Kinase           | Cell Signaling Technology # 9202  |
| Monoclonal rabbit-anti-phospho-S6 Ribosomal Protein | Cell Signaling Technology # 4858  |
| Monoclonal rabbit-anti-total-S6 Ribosomal Protein   | Cell Signaling Technology # 2217  |
| Polyclonal rabbit-anti-phospho-Mnk1                 | Cell Signaling Technology # 2111  |
| Monoclonal rabbit-anti-total-Mnk1                   | Cell Signaling Technology # 2195  |
| Polyclonal rabbit-anti-phospho-p90RSK               | Cell Signaling Technology # 9346  |
| Monoclonal rabbit-anti-total-p90RSK                 | Cell Signaling Technology # 9355  |
| Monoclonal rabbit-anti-FoxO1                        | Cell Signaling Technology # 2880  |

|                                                 |                                   |
|-------------------------------------------------|-----------------------------------|
| Monoclonal rabbit-anti-FoxO3a                   | Cell Signaling Technology # 12829 |
| Polyclonal rabbit-anti-FoxO4                    | Cell Signaling Technology # 9472  |
| Monoclonal rabbit-anti-HDAC4                    | Cell Signaling Technology # 7628  |
| Monoclonal mouse-anti-myogenin                  | DSHB #F5D                         |
| Polyclonal rabbit-anti- $\alpha$ -Tubulin       | Cell Signaling Technology # 2144  |
| Polyclonal rabbit-anti-Smad6                    | Invitrogen # PA1-41026            |
| Polyclonal rabbit-anti-MAFbx (Atrogin-1)        | ECM Biosciences, AP2041           |
| Polyclonal goat-anti-MuRF1                      | R&D Systems, AF5366               |
| Monoclonal mouse-anti-Ubiquitin                 | Santa Cruz Biotechnology, sc-8017 |
| Monoclonal rabbit-anti-Lamin B1                 | Cell Signaling Technology # 13435 |
| Monoclonal mouse-anti-Puromycin                 | Millipore, MABE343                |
| Polyclonal rabbit-anti-Laminin                  | Sigma, L9393                      |
| Polyclonal rabbit-anti-Dystrophin               | Abcam, ab15277                    |
| Monoclonal mouse-anti-Myosin heavy chain        | DSHB #MF 20                       |
| Monoclonal mouse-anti-SV2                       | DSHB #SV2                         |
| Monoclonal mouse-anti-(NF-M)                    | DSHB #2H3                         |
| Polyclonal goat-anti-mouse IgG Alexa Fluor 568  | Invitrogen # A-11004              |
| Polyclonal goat-anti-rabbit IgG Alexa Fluor 568 | Invitrogen # A-11036              |

**Supplementary Table 2.** Sequence of the primers used for QRT-PCR in the study.

| <b>Gene Name</b> | <b>Forward primer (5'-3')</b>      | <b>Reverse primer (5'-3')</b>   |
|------------------|------------------------------------|---------------------------------|
| <i>Chrna1</i>    | AAG CTA CTG TGA GAT CAT CGT<br>CAC | TGA CGA AGT GGT AGG TGA TGT CCA |
| <i>Chrn1</i>     | ACG GTC CAC AAC CAT GGC            | CAT CAT CGC TCA CCC CAC         |
| <i>Agrn</i>      | CCT CAA CTT GGA CAC GAA GCT        | AGG CCG ATG CCC ACA GA          |
| <i>Musk</i>      | TGA GAA CTG CCC CTT GGA ACT        | GGG TCT ATC AGC AGG CAG CTT     |
| <i>Dok7</i>      | TCT CCC AGA CCC GAG TTC TG         | TCT AGC TGC AGG GCT TCC         |
| <i>Hdac4</i>     | CAG ATG GAC TTT CTG GCC G          | CTT GAG CTG CTG CAG CTT C       |
| <i>Myog</i>      | CAT CCA GTA CAT TGA GCG CCT A      | GAG CAA ATG ATC TCC TGG GTT G   |
| <i>Bmpr1a</i>    | GAA AGA CCT GAT TGA CCA GTC C      | CCC ATC CAT ACT TCT CCA TAG C   |
| <i>Bmpr1b</i>    | GAA TAC CAG CTT CCC TAT CAC G      | TCT GCC TGA GAC ACT CAT CAC T   |
| <i>Bmpr2</i>     | TTG GAC TCA TCT ACT GGG AGG T      | TGG ACA CAA GAA CCT GCA TAT C   |
| <i>Acvr1b</i>    | AAG CTG AGA GTT GGG AGA AG         | GGG CTT TAG ACT TGG TCT GT      |
| <i>Acvr1c</i>    | AAC TTT GCC AAC AGC TAG TC         | GGC AGA GAA GAA TGT ACA CC      |
| <i>Tgfb2</i>     | CTT CAC TTC CGG GTC ATC AT         | GCG ATG CTA TTC CTT GGT CT      |
| <i>Bmp4</i>      | GAC TTC GAG GCG ACA CTT CTA C      | CAG ATG TTC TTC GTG ATG GAA A   |
| <i>Bmp7</i>      | AGC TTC GTC AAC CTA GTG GAA C      | CTG GAG CAC CTG ATA GAC TGT G   |
| <i>Bmp8a</i>     | CCT ATT ACT GTG AGG GGG AGT G      | TGA CAT TGT TGC TGC TGT CAT A   |
| <i>Bmp8b</i>     | TCC ACT TTG ACC TAA CCC AGA T      | GTC AGA CTC CCT GTT GGA GTG     |
| <i>Bmp13</i>     | AAG ACT TAC TCC ATT GCC GAG A      | TCG TCC AGT CCT CTG TCT ACA A   |
| <i>Bmp14</i>     | ATG CTG ACA GAA AGG GAG GTA A      | GCA CTG ATG TCA AAC ACG TAC C   |
| <i>Bmp15</i>     | GAA AAT GGT GAG GCT GGT AAA G      | TCG TAT GCT ACC TGG TTT GAT G   |
| <i>Tgfb1</i>     | CTG AAC CAA GGA GAC GGA ATA C      | GGG CTG ATC CCG TTG ATT T       |
| <i>Tgfb2</i>     | GGC TTT CAT TTG GCT TGA GAT G      | CTT CGG GTG AGA CCA CAA ATA G   |
| <i>Tgfb3</i>     | GTA CAT CTG CTC TAG GGA ATT GG     | CCA GGC AGT GCA AGA TAT GA      |
| <i>Fst</i>       | AAC GTT GGG AGA GAG GAT GA         | GAC AGG TTG AAA GTG TGC CT      |
| <i>Bmp2</i>      | GCA GCT TCC ATC ACG AAG A          | GAT GTG AGA AAC TCG TCA CTG G   |
| <i>Bmp3</i>      | CGA ATG GAT TAT CTC TCC CAA G      | AAC AAG ATG CTG AGT GAG GAC A   |
| <i>Bmp5</i>      | AGG AAT ACA CAA ACA GGG ATG C      | CCA GCA GAT TTT ACA TTG ATG C   |
| <i>Bmp6</i>      | TCT TCA GAC TAC AAC GGC AGT G      | ATC ACA GTA GTT GGC AGC GTA G   |
| <i>Bmp11</i>     | CTT GGA AGA GGA CGA GTA CCA C      | CTG AAG TGG AAA TGA CAG CAG A   |
| <i>Bmp12</i>     | CAT GAT GTC GCT TTA CAG GAG        | GAT ACG TCG AAC AGG AAG CTC T   |
| <i>Mstn</i>      | AAT CCA CCA CGG TGC TAA TG         | TTA GTG CTG TGT GTG TGG AG      |
| <i>Inhba</i>     | AGA ACG GGT ATG TGG AGA TAG A      | GAC TCG GCA AAG GTG ATG AT      |
| <i>Acvr2a</i>    | GTT ACA CCG AAG CCA CCC TA         | AAC CAA ATC TTC CCC TTG CT      |
| <i>Acvr2b</i>    | TTA AGG ATC ACT GGC TGA AAC A      | GGA TAC CCG CTC TTC TAC ACA G   |
| <i>Fbxo30</i>    | TCGTGGAATGGTAATCTTGC               | CCTCCCGTTTCTCTATCACG            |
| <i>Tak1</i>      | GTCATCCAGCCCTAGTGTGAGAAT           | TTCTTTGGAGTTTGGGCACG            |
| <i>β-actin</i>   | CAGGCATTGCTGACAGGATG               | TGCTGATCCACATCTGCTGG            |
